1 **Compensatory evolution facilitates the acquisition of multiple plasmids in bacteria**

2

3 Alfonso SANTOS-LOPEZ<sup>1#</sup>, Cristina BERNABE-BALAS<sup>1</sup>, Alvaro SAN MILLAN<sup>1 Φ</sup>,  
4 Rafael ORTEGA-HUEDO<sup>1</sup>, Andreas HOEFER<sup>1</sup>, Manuel ARES-ARROYO<sup>1</sup>, and Bruno  
5 GONZALEZ-ZORN<sup>1\*</sup>.

6

7 <sup>1</sup> *Departamento de Sanidad Animal and Centro de Vigilancia Sanitaria Veterinaria*  
8 *(VISAVET), Facultad de Veterinaria, Universidad Complutense de Madrid, Spain*

9 <sup>#</sup> *Current address: Department of Microbiology and Molecular Genetics, University of*  
10 *Pittsburgh, Pittsburgh, Pennsylvania, USA.*

11 <sup>Φ</sup> *Current address: Department of Microbiology, Ramón y Cajal University Hospital*  
12 *(IRYCIS), and CIBERESP. 28034, Madrid, Spain.*

13

14

15 \*Corresponding author: [bgzorn@ucm.es](mailto:bgzorn@ucm.es); Tel.: +34 91 3943707

16

## 17 **Abstract**

18 The coexistence of multicopy plasmids is a common phenomenon. However, the  
19 evolutionary forces promoting these genotypes are poorly understood. In this study, we  
20 have analyzed multiple ColE1 plasmids (pB1000, pB1005 and pB1006) coexisting  
21 within *Haemophilus influenzae* RdKW20 in all possible combinations. When  
22 transformed into the naïve host, each plasmid type presented a particular copy number  
23 and produced a specific resistance profile and biological cost, whether alone or  
24 coexisting with the other plasmids. Therefore, there was no fitness advantage associated  
25 with plasmid coexistence that could explain these common plasmid associations in  
26 nature. Using experimental evolution, we showed how *H. influenzae* Rd was able to  
27 completely compensate the fitness cost produced by any of these plasmids. Crucially,  
28 once the bacterium has compensated for a first plasmid, the acquisition of new  
29 multicopy plasmid(s) did not produced any extra biological cost. We argue therefore  
30 that compensatory adaptation pave the way for the acquisition of multiple coexisting  
31 ColE1 plasmids.

## 32 **Importance**

33 Antibiotic resistance is a major concern for human and animal health. Plasmids play a  
34 major role in the acquisition and dissemination of antimicrobial resistance genes. In this  
35 report we investigate, for the first time, how plasmids are capable to cohabit stably in  
36 populations. This coexistence of plasmids is driven by compensatory evolution  
37 alleviating the cost of a first plasmid, which potentiates the acquisition of further  
38 plasmids at no extra cost. This phenomenon explains the high prevalence of plasmids  
39 coexistence in wild type bacteria, which generates multiresistant clones and contributes  
40 to the maintenance and spread of antibiotic resistance genes within bacterial  
41 populations.

## 42 Introduction

43 Antibiotic resistance is a serious problem in animal and human health and bacterial  
44 plasmids play an essential role in the dissemination of resistance (1). In last years,  
45 numerous works have described the importance of small ColE1-like plasmids in the  
46 dissemination of resistance genes (2-15). These plasmids replicate via two RNAs (16).  
47 Natural SNPs in these RNAs allow different ColE1-like plasmids to stably cohabit  
48 within the same cell (17, 18). If the plasmids bear antibiotic resistance genes, this  
49 cohabitation confers antibiotic multiresistance to the host bacteria (9).

50 The acquisition of plasmids usually entails a biological cost to the host bacterium that  
51 will generate a selection against plasmid-bearing clones (19, 20). Thus, it is reasonable  
52 to assume that the accumulation of various plasmids will decrease the fitness of bacteria  
53 and therefore clones bearing several plasmids will be outcompeted in bacterial  
54 populations. Notwithstanding, ColE1 plasmids cohabitation is a common phenomenon  
55 in nature (9, 11, 13, 14, 21). In this study we test two hypotheses that could explain the  
56 high prevalence of plasmid coexistence in nature: i) Positive epistasis: the cost imposed  
57 by multiple ColE1 plasmids is lower than the addition of the costs produced by each of  
58 the plasmids alone (22) and ii) compensatory evolution increasing permissiveness to  
59 ColE1-like plasmids: once the bacterium has compensated the cost of a single plasmid  
60 the acquisition of new replicons does not affect the bacterial fitness (23).

61 Here, we demonstrated that once the fitness cost of a ColE1-like plasmid is  
62 compensated the acquisition of more ColE1-like plasmids does not incur any biological  
63 cost to the bacteria, facilitating plasmid cohabitation.

## 64 Materials and Methods

65 **Bacterial strains, culture conditions and antibiotic susceptibility determination.** All  
66 strains and plasmids used in this study are listed in Table S1. *H. influenzae* was  
67 electroporated with pB1000, pB1005 and/or pB1006 from *P. multocida* BB1044 (9) as  
68 previously described (10). *H. influenzae* was cultured on chocolate agar PolyViteX  
69 plates (BioMérieux, France) and in *Haemophilus* Test Medium (HTM) broth (Wider,  
70 Francisco Soria Melguizo, Spain) shaking at 125 RPM and 37° C in microaerophilic  
71 conditions (5% CO<sub>2</sub>). Antibiotic susceptibility was determined via minimal inhibitory  
72 concentration (MIC) of ampicillin, streptomycin and tetracycline by broth microdilution  
73 according to the CLSI guidelines (24).

74 **Plasmid stability.** We assessed the stability of the plasmids in all ColE1-bearing strains  
75 (Table 1). All three plasmids in the seven combinations presented 100% stability in *H.*  
76 *influenzae* Rd after 200 generations.

77 **Plasmid copy number quantification.** The average plasmid copy number per cell was  
78 determined by quantitative PCR (qPCR) as described by San Millan *et al.* (25). To  
79 determine the plasmid copy number five independent DNA extractions were performed  
80 for each strain and qPCR was then carried out in triplicate for each extraction. Each

81 strain was grown in 2 ml of fresh HTM and the DNA was extracted at an OD600 of  
82 approximately 0.9 using the QIAamp DNA Mini Kit (Qiagen, Inc, Chatworth,  
83 California, USA). The DNA was quantified using a Nanodrop. Following the  
84 indications of Providenti *et al.* (26), digested DNA is a better template for plasmid  
85 quantification by qPCR than non-digested DNA. Therefore, plasmids were linearized  
86 with *PstI* (Takara, Japan) for 2 hours at 37°C. In order to determine the average plasmid  
87 copy number per chromosome, the chromosomal monocopy gene *rpoB* was amplified to  
88 compare the ratio of plasmid-chromosomal DNA.

89 qPCRs were performed using a My iQ Single Color Real-Time PCR Detection System  
90 (Bio-Rad laboratories) with the iQ SYBR Green Supermix (Bio-Rad Laboratories) at a  
91 final DNA concentration of 10 pg/μl. The reaction efficiency was calculated for each  
92 reaction based on the standard curve generated by performing a qPCR with five 8-fold  
93 dilutions of the template DNA in triplicate (~0.2 ng/μl to 50 fg/μl working range of  
94 DNA concentration), and reactions with an R<sup>2</sup> lower than 0.985 were discarded. All  
95 primers used in the reactions, as well as the melting temperatures and efficiencies of the  
96 qPCRs are described in Table S2. The amplification conditions were as follows: initial  
97 denaturation for 10 min at 94°C, followed by 30 cycles of denaturation for 1' at 94°C,  
98 annealing for 1' at 51,7°C (*rpoB*) or 58,5°C (pB1000) 55,1°C (pB1005) and 54,6°C  
99 (pB1006) and extension for 1' at 72°C. Inter-run calibration samples were used to  
100 normalize the results from different plates of each qPCR. To calculate plasmid copy  
101 number per chromosome we used the following formula:

$$102 \quad cn = \frac{(1 + E_c)^{C_{tc}}}{(1 + E_p)^{C_{tp}}} * \frac{S_c}{S_p}$$

103 Where *cn* is the plasmid copy number per chromosome, *S<sub>c</sub>* and *S<sub>p</sub>* are the sizes of the  
104 chromosomal and plasmid amplicons (in bp), *E<sub>c</sub>* and *E<sub>p</sub>* are the efficiencies of the  
105 chromosomal and plasmid qPCRs (relative to 1), and *C<sub>tc</sub>* and *C<sub>tp</sub>* are the threshold  
106 cycles of the chromosomal and plasmid reactions, respectively.

### 107 **Fitness determination**

108 Bacterial fitness was determined by direct competition experiments between *H.*  
109 *influenzae* Rd and *H. influenzae* Rd bearing plasmid(s) in HTM medium in 3-5  
110 independent experiments (25). Strains were grown for 16 hours at 37°C and 5% CO<sub>2</sub> in  
111 HTM, then 10<sup>6</sup> CFU of each competitor were suspended in 2 ml of HTM broth. The  
112 inocula was grown at 37° C, 5% CO<sub>2</sub> and 125 RPM for 24 hours, after which 10<sup>6</sup> CFU  
113 were transferred to 2 ml of fresh HTM every 24 hours (1/1000) for 5 days, resulting in  
114 10 generations per serial passage. Samples were taken at time 0 and every 24 hours for  
115 5 days. Aliquots were then plated onto non-selective chocolate agar, and the ratio of the  
116 two competing strains was measured by replica plating 50-100 colonies on chocolate  
117 agar plates containing ampicillin, streptomycin and/or tetracycline corresponding the  
118 resistance gene(s) borne by the plasmid(s). The selection coefficients (*s*) were calculated  
119 using the regression model  $s = \ln(CI/t)$ , where the CI (competition index) was calculated

120 everyday as the ratio between the CFU of the resistant and susceptible strains at  $t1$   
121 divided by the same ratio at  $t0$ . Time (t) was calculated as the  $\log_2$  of the dilution factor  
122 (i.e. number of bacterial generations). Relative fitness (W) was calculated as  $1-s$ .

123 Epistasis among plasmids was determined as described by Hall *et al.*(27). Epistasis ( $\epsilon$ )  
124 can be calculated as  $\epsilon = W_{(\text{plasmid A;plasmid B})} - W_{(\text{plasmid A})} \times W_{(\text{plasmid B})}$ , where  $W_{(\text{plasmid A})}$  or  
125  $W_{(\text{plasmid B})}$  is the relative fitness of the strain bearing plasmid 1 or plasmid 2 compared  
126 to the plasmid free strain and  $W_{(\text{plasmid A;plasmid B})}$  is the relative fitness of the  
127 strain bearing both plasmids relative to the same plasmid free strain. Then, the  
128 propagation error ( $\sigma_\epsilon$ ) was calculated by applying with the formula:

$$129 \quad \sigma_\epsilon = \sqrt{\sigma^2_{(\text{plasmid A ; plasmid B})} + \sigma^2_{(\text{plasmid A})} W^2_{(\text{plasmid B})} + \sigma^2_{(\text{plasmid B})} W^2_{(\text{plasmid A})}}$$

130 If the epistasis value is within the propagation error range, there are no significant  
131 epistatic interactions between the plasmids. If on the other hand the value is beyond the  
132 range of the propagation error one can assume that there are epistatic interactions. Both  
133 formulas were adjusted to estimate the epistasis among the three plasmids.

#### 134 ***In silico* analysis**

135 We analyzed all Pasteurellaceae and Enterobacteriaceae genomes available in the  
136 GenBank database as of November 2015. Only genomes with the status “Complete”  
137 were included in the analysis.

#### 138 **Results and discussion**

##### 139 **Coexistence of multicopy plasmids is common in nature**

140 ColE1 plasmids are found mainly in the families of bacteria Enterobacteriaceae and  
141 Pasteurellaceae (2, 4, 7, 9, 15, 28-30). We combined *in silico* and experimental  
142 information to analyze the prevalence of ColE1 plasmid coexistence in nature.

143 We scanned the presence of ColE1 plasmids in the Enterobacteriaceae family where  
144 they were first described (16). We detected 631 plasmids in databases, in 490 complete  
145 genomes. 100 plasmids (16% of the total) belonged to the ColE1 superfamily. 45% of  
146 ColE1 plasmids coexisted with at least another ColE1 plasmid in the same cell (Table  
147 S1). We analyzed the distribution of ColE1 plasmids described in the  
148 Enterobacteriaceae genomes. As described by San Millan *et al.* (22) if plasmids were  
149 distributed randomly, they would follow a Poisson distribution across bacterial hosts. If  
150 there is any factor influencing the plasmid distribution such as conjugation, epistasis or  
151 selection, the observed ratio of plasmid per genome may suffer a significant deviation  
152 from the expected Poisson distribution. We found significantly different pattern  
153 between the observed and the expected distribution of genomes bearing zero, one, and  
154 two or more ColE1 plasmids: (chi-square test,  $P < 0.001$ ,  $\chi^2 = 0.903$ ,  $df = 2$ ) (Figure 1).  
155 Observed strains lacking plasmids are as common as expected, while strains carrying  
156 only one ColE1 replicon were underrepresented and the strains bearing 2 or more ColE1

157 plasmids were overrepresented. These results confirm a tendency towards ColE1  
158 plasmid coexistence in enterobacteria.

159 In Pasteurellaceae there were too few genomes available in databases for a robust  
160 analysis. However, previous works suggested that ColE1 plasmid coexistence is also  
161 common (9-12, 31, 32). Actually, plasmid pB1000, which is the most widely distributed  
162 ColE1-like plasmid in this family, has been always described coexisting with other  
163 ColE1 plasmids: in *Haemophilus parasuis* (32), *Pasteurella aerogenes* (33)  
164 *Actinobacillus pleuropneumoniae* (Accession number to GenBank: CP001904) and  
165 *Pasteurella multocida* (9) (see Table S1). Taken together, our data showed that  
166 coexistence of ColE1-like plasmids is a frequent event in nature.

### 167 **Biological cost of ColE1 plasmids has a multiplicative effect**

168 Plasmids produce a fitness cost in bacteria (19, 20). It is reasonable to assume that  
169 bacteria bearing two (or three) plasmids would present a decrease in fitness compared to  
170 bacteria bearing only one plasmid. However, Silva *et al.* (34) and San Millan *et al.* (22)  
171 have demonstrated that, in some cases, the presence of one plasmid favors the presence  
172 of a second: once a bacterium had acquired a plasmid, the presence of a second (or  
173 third) plasmid in the host does not incur an additional significant biological cost,  
174 even when these plasmids produced a cost when they are alone in the cell. This  
175 phenomenon is known as positive epistasis between coexisting plasmids.

176 To determine whether epistatic interactions can explain ColE1 coexistence, we  
177 transformed *H. influenzae* RdKw20 (Rd hereinafter) by electroporation with the  
178 plasmids pB1000, pB1005 and pB1006, recovered from the a clinical isolate of *P.*  
179 *multocida* BB1044 (9). Thus, we produced a model of bacteria with seven possible  
180 plasmid combinations (one, two or three different ColE1 plasmids per bacterium). All  
181 three plasmids are composed by a variable region in which antibiotic resistance genes  
182 are encoded -*bla*<sub>ROB-1</sub> in pB1000, *strA* in pB1005 and the *tet(O)* in pB1006- and a  
183 highly similar conserved region with the plasmid housekeeping functions (Figure S1).

184 To estimate the biological cost associated with the replicon(s), we performed direct  
185 competition assays between *H. influenzae* Rd strain bearing the plasmid(s) and the  
186 plasmid-free *H. influenzae* Rd strain in culture medium lacking antibiotic pressure. As  
187 expected, bacteria bearing one or more plasmid(s) were less fit than the ancestral strain  
188 (Table 1 and Figure 2). In order to test if epistatic interactions were able to explain  
189 coexistence of ColE1 replicons, we calculated epistasis as described by Hall *et al.* (27)  
190 (see methods). No significant epistatic interactions were found across the four  
191 combinations: pB1005/pB1006 ( $\epsilon = -0.009$ ,  $\sigma_{\epsilon} = \pm 0.0425$ ), pB1000/pB1006 ( $\epsilon = -0.017$ ,  
192  $\sigma_{\epsilon} = \pm 0.042$ ), pB1000/pB1005 ( $\epsilon = 0.000$ ,  $\sigma_{\epsilon} = \pm 0.025$ ) and pB1000/pB1005/pB1006 ( $\epsilon$   
193  $= 0.0002$ ,  $\sigma_{\epsilon} = \pm 0.021$ ). (Figure 2). The biological cost of ColE1 plasmids produced a  
194 multiplicative effect: the relative fitness of strains carrying two or more ColE1 plasmids  
195 (e.g.  $W_{(pB1000, pB10056)} = 0.899$ ) was not significantly different from a multiplication of  
196 the relative fitnesses of the two bacteria bearing each one of the plasmids (e.g.  $W_{(pB1000)}$

197  $\times W_{(pB1006)} = 0.946 \times 0.979 = 0.899$ ). These results therefore suggest that epistatic  
198 interactions among recently acquired plasmids are may not be at the origin of ColE1  
199 plasmid coexistence.

### 200 **The cost of ColE1-like plasmids is proportional to total plasmid copy number**

201 Previous reports showed that the biological cost of a single plasmid, including a ColE1  
202 plasmid (18, 35), is proportional to its copy number in the host cell (19, 36). We  
203 measured plasmid copy number (PCN) of pB1000, pB1005 and pB1006 in all the  
204 strains using quantitative PCR (qPCR) (Table 1, Figure 3). For all three plasmids, their  
205 specific PCN remained equal whether coexisting with the other plasmids or inhabiting  
206 the cell alone: pB1000 (ANOVA:  $P = 0.95$ ;  $F = 0,10$ ;  $df = 3, 16$ ), pB1005 (ANOVA:  $P$   
207  $= 0,79$ ;  $F = 0,33$ ;  $df = 3, 16$ ) and pB1006 (ANOVA:  $P = 0.54$ ;  $F = 0,75$ ;  $df = 3, 16$ ).  
208 These results suggested that replication of these ColE1 plasmids, and therefore PCN  
209 control, remained independent despite the high similarity of their conserved region.  
210 Interestingly the total PCN, regardless of plasmid type, strongly correlated with the  
211 reduction of relative fitness in the host bacteria (Pearson's test  $r(19) = 0.90$ ;  $P < 0.001$ )  
212 (Figure 3). Therefore, the total number of plasmids present in the cell could explained  
213 the biological cost imposed by these ColE1 replicons in a non-adapted host, even when  
214 the plasmids carried different resistance genes.

215 We also analyzed the resistance levels conferred by the plasmids in the different  
216 combinations. We measured the minimal inhibitory concentration (MIC) of the three  
217 main antibiotics counteracted by the three plasmids (pB1006; tetracycline, pB1005;  
218 streptomycin and pB1000; ampicillin). The resistance levels conferred by these  
219 plasmids remained constant whether they were alone or coexisting, suggesting that  
220 plasmid coexistence did not affect the expression level of these genes (Table 1).

221 In summary, our results showed that recently acquired ColE1 plasmids acted as  
222 independent biological units in the cell, conferring antibiotic resistance, maintaining  
223 copy number and imposing fitness costs autonomously.

224

### 225 **Compensatory evolution favors the acquisition of new ColE1 plasmids**

226 Our results suggested that the common coexistence of ColE1 plasmids in nature is not  
227 due to positive epistasis alleviating the cost imposed by multiple plasmids. An  
228 alternative hypothesis that we propose here is that plasmid coexistence may be  
229 promoted by compensatory evolution. The idea underlying this hypothesis is that after  
230 the acquisition of a first (ColE1) plasmid by a bacterium, compensatory evolution will  
231 eliminate the fitness cost produced this plasmid (22, 37-45). If the cost imposed by  
232 different ColE1 plasmids comes from a similar origin, as our previous results suggested,  
233 adaptation to this plasmid would facilitate the acquisition of further ColE1 plasmids at  
234 no extra cost.

235 To test this hypothesis, we propagated *H. influenzae* Rd bearing pB1000, which is the  
236 plasmid imposing the highest fitness cost (approximately 5% reduction in relative  
237 fitness), for 200 generations. Rd/pB1000 increased 18% its relative fitness after 100 and  
238 25% after 200 generations. We selected 1 clone from the Rd/pB1000 population after  
239 100 and 200 generations and we transformed pB1006 and pB1005 separately and  
240 together in these clones. We measured the relative fitness of all these clones and,  
241 interestingly, there were no significant differences among the relative fitnesses of  
242 Rd/pB1000 clones and the new clones bearing also pB1005, pB1006 and  
243 pB1005/pB1006 at generation 100 (ANOVA  $P = 0,85$   $F = 0,16$   $df = 2,6$ ) or 200  
244 (ANOVA  $P = 0,92$   $F = 0,16$   $df = 2,6$ ) (Figure 4). In addition, there were no differences  
245 in the plasmid copy number across the experiment: pB1000 (ANOVA  $P = 0.75$ ,  $F =$   
246  $0.29$   $df = 2,12$ ), pB1005 (ANOVA  $P = 0.25$ ,  $F = 1.83$   $df = 2,5$ ) and pB1006 (ANOVA  $P$   
247  $= 0.71$ ,  $F = 0.36$   $df = 2,6$ ) showing that the reduction of the fitness cost of the replicons  
248 were not related with a decrease in the plasmid copy number.

249 To confirm that the absence of costs associated to additional plasmid carriage in our  
250 experiment was a result of compensatory evolution and not only a result of general  
251 adaptation to the experimental conditions, we propagated the Rd strain lacking the  
252 plasmid in the same conditions as described above during 100 generations. This evolved  
253 Rd strain increased its relative fitness approximately 21.5% (SEM = 0,011) compared to  
254 the ancestral Rd (Figure 4). We selected a clone from the population and we  
255 electroporated pB1006, pB1005, pB1000 and pB1006/pB1005/pB1000. The fitness cost  
256 ( $s$ ) of the plasmids in the resulting strains were: pB1006  $s = -0,034$  (SEM  $\pm 0.008$ ),  
257 pB1005  $s = -0.086$  (SEM  $\pm 0.050$ ), pB1000  $s = -0,045$  (SEM  $\pm 0.018$ ) and  
258 pB1006/pB1005/pB1006  $s = -0,078$  (SEM  $\pm 0.019$ ). Therefore, the plasmids imposed  
259 the same biological cost as in the non-evolved strain: pB1006 (two-tailed t-test  $P = 0.55$ ;  
260  $t = -1.92$ ;  $df = 4$ ), pB1005 (two-tailed t-test  $P = 0.57$ ;  $t = -0.97$ ;  $df = 4$ ), pB1000 (two-  
261 tailed t-test  $P = 0.62$ ;  $t = -0.80$ ;  $df = 4$ ) and pB1006/pB1005/pB1000 (two-tailed t-test  $P$   
262  $= 0.29$ ;  $t = -0,40$ ;  $df = 4$ ).

263 Taken together, these results showed that compensation of the cost produced by pB1000  
264 facilitated the acquisition of pB1005 and pB1006 cost by the host bacterium at no  
265 additional (Figure 5).

## 266 **Conclusion**

267 This study provides new information regarding the biology, cost, persistence and  
268 maintenance of multicopy plasmids in bacterial populations. ColE1 plasmids tend to  
269 coexist in natural bacteria, conferring antibiotic multiresistance (9, 13, 14). Our results  
270 suggest that compensatory evolution mitigating the initial cost produced by a ColE1  
271 plasmid pre-adapts the host bacterium to acquire extra ColE1 plasmids. Although we  
272 have only explored the case of plasmids ColE1, a recent report showed that mutations  
273 compensating for a particular plasmid also alleviated the cost of plasmids from different  
274 families (23). Therefore, we argue that the ability of different bacteria to compensate the



275 costs produced by plasmids may play a key role shaping the distribution of plasmids  
276 across bacteria (46).

### 277 **Acknowledgment**

278 This work was supported by REDEEX-2 (MICINN, BFU 2011-14145-E) and EU  
279 projects EvoTAR 282004-FP7 and EFFORT 613754-FP7. We thank Natalia Montero  
280 for excellent technical assistance.

### 281 **Author contribution**

282 AS-L, ASM and BG-Z conceived and designed the experiments; AS-L, MA-A, CB-B  
283 performed the experiments; AS-L, ASM, and BG-Z analyzed the data; RO-H  
284 contributed reagents/materials analysis tools; AS-L, AH, ASM and BG-Z wrote the  
285 paper; BG-Z approved the final version of the manuscript.

## 286 References

- 287 1. Carattoli A. 2013. Plasmids and the spread of resistance. *Int J Med Microbiol* 303:298-  
288 304.
- 289 2. Cao V, Lambert T, Courvalin P. 2002. ColE1-like plasmid pIP843 of *Klebsiella*  
290 *pneumoniae* encoding extended-spectrum beta-lactamase CTX-M-17. *Antimicrobial*  
291 *agents and chemotherapy* 46:1212-7.
- 292 3. Handford CL, Stang CT, Raivio TL, Dennis JJ. 2009. The contribution of small cryptic  
293 plasmids to the antibiotic resistance of enteropathogenic *Escherichia coli* E2348/69.  
294 *Can J Microbiol* 55:1229-39.
- 295 4. Zioga a, Whichard JM, Kotsakis SD, Tzouveleakis LS, Tzelepi E, Miriagou V. 2009. CMY-31  
296 and CMY-36 cephalosporinases encoded by colE1-like plasmids. *Antimicrobial Agents*  
297 *and Chemotherapy* 53:1256-1259.
- 298 5. Pallecchi L, Riccobono E, Sennati S, Mantella A, Bartalesi F, Trigoso C, Gotuzzo E,  
299 Bartoloni A, Rossolini GM. 2010. Characterization of small ColE-like plasmids mediating  
300 widespread dissemination of the qnrB19 gene in commensal enterobacteria.  
301 *Antimicrob Agents Chemother* 54:678-82.
- 302 6. Pallecchi L, Riccobono E, Mantella A, Fernandez C, Bartalesi F, Rodriguez H, Gotuzzo E,  
303 Bartoloni A, Rossolini GM. 2011. Small qnrB-harboring ColE-like plasmids widespread  
304 in commensal enterobacteria from a remote Amazonas population not exposed to  
305 antibiotics. *J Antimicrob Chemother* 66:1176-8.
- 306 7. Chen CY, Strobaugh TP, Frye JG. 2010. Characterization of small ColE1-like plasmids  
307 conferring kanamycin resistance in *Salmonella enterica* subsp. *enterica* serovars  
308 Typhimurium and Newport. *Plasmid* 63:150-4.
- 309 8. Kehrenberg C, Schwarz S. 2000. Identification of a truncated, but functionally active  
310 tet(H) tetracycline resistance gene in *Pasteurella aerogenes* and *Pasteurella multocida*.  
311 *FEMS Microbiol Lett* 188:191-5.
- 312 9. San Millan A, Escudero JA, Gutierrez B, Hidalgo L, Garcia N, Llagostera M, Dominguez L,  
313 Gonzalez-Zorn B. 2009. Multiresistance in *Pasteurella multocida* is mediated by  
314 coexistence of small plasmids. *Antimicrobial Agents and Chemotherapy* 53:3399-3404.
- 315 10. San Millan A, Garcia-Cobos S, Escudero JA, Hidalgo L, Gutierrez B, Carrilero L, Campos J,  
316 Gonzalez-Zorn B. 2010. *Haemophilus influenzae* clinical isolates with plasmid pB1000  
317 bearing bla<sub>ROB-1</sub>: fitness cost and interspecies dissemination. *Antimicrob Agents*  
318 *Chemother* 54:1506-11.
- 319 11. Molerés J, Santos-López A, Lázaro I, Labairu J, Prat C, Ardanuy C, González-Zorn B,  
320 Aragon V, Garmendia J. 2015. Novel bla<sub>ROB-1</sub>-Bearing Plasmid Conferring Resistance  
321 to  $\beta$ -Lactams in *Haemophilus parasuis* Isolates from Healthy Weaning Pigs. *Appl*  
322 *Environ Microbiol* 81:3255-67.
- 323 12. Tristram SG, Littlejohn R, Bradbury RS. 2010. bla<sub>ROB-1</sub> presence on pB1000 in  
324 *Haemophilus influenzae* is widespread, and variable cefaclor resistance is associated  
325 with altered penicillin-binding proteins. *Antimicrob Agents Chemother* 54:4945-7.
- 326 13. Stoesser N, Sheppard AE, Pankhurst L, De Maio N, Moore CE, Sebra R, Turner P, Anson  
327 LW, Kasarskis A, Batty EM, Kos V, Wilson DJ, Phetsouvanh R, Wyllie D, Sokurenko E,  
328 Manges AR, Johnson TJ, Price LB, Peto TE, Johnson JR, Didelot X, Walker AS, Crook DW,  
329 Modernizing Medical Microbiology Informatics G. 2016. Evolutionary History of the  
330 Global Emergence of the *Escherichia coli* Epidemic Clone ST131. *MBio* 7:e02162.
- 331 14. Stoesser N, Sheppard AE, Peirano G, Anson LW, Pankhurst L, Sebra R, Phan HTT,  
332 Kasarskis A, Mathers AJ, Peto TEA, Bradford P, Motyl MR, Walker AS, Crook DW, Pitout  
333 JD. 2017. Genomic epidemiology of global *Klebsiella pneumoniae* carbapenemase  
334 (KPC)-producing *Escherichia coli*. *Sci Rep* 7:5917.

- 335 15. de Toro M, Rodriguez I, Rojo-Bezares B, Helmuth R, Torres C, Guerra B, Saenz Y. 2013.  
336 pMdT1, a small ColE1-like plasmid mobilizing a new variant of the aac(6')-Ib-cr gene in  
337 *Salmonella enterica* serovar Typhimurium. *J Antimicrob Chemother* 68:1277-80.
- 338 16. Tomizawa JI, Ohmori H, Bird RE. 1977. Origin of replication of colicin E1 plasmid DNA.  
339 *Proc Natl Acad Sci U S A* 74:1865-9.
- 340 17. Lacatena RM, Cesareni G. 1981. Base pairing of RNA I with its complementary  
341 sequence in the primer precursor inhibits ColE1 replication. *Nature* 294:623-6.
- 342 18. Santos-Lopez A, Bernabe-Balas C, Ares-Arroyo M, Ortega-Huedo R, Hoefler A, San  
343 Millan A, Gonzalez-Zorn B. 2017. A Naturally Occurring Single Nucleotide  
344 Polymorphism in a Multicopy Plasmid Produces a Reversible Increase in Antibiotic  
345 Resistance. *Antimicrob Agents Chemother* 61.
- 346 19. Baltrus DA. 2013. Exploring the costs of horizontal gene transfer. *Trends in Ecology &*  
347 *Evolution* 28:489-95.
- 348 20. San Millan A, MacLean RC. 2017. Fitness Costs of Plasmids: a Limit to Plasmid  
349 Transmission. *Microbiology Spectrum* 5. no. 5 doi:10.1128/microbiolspec.MTBP-0016-  
350 2017
- 351 21. Lanza VF, de Toro M, Garcillan-Barcia MP, Mora A, Blanco J, Coque TM, de la Cruz F.  
352 2014. Plasmid flux in *Escherichia coli* ST131 sublineages, analyzed by plasmid  
353 constellation network (PLACNET), a new method for plasmid reconstruction from  
354 whole genome sequences. *PLoS Genet* 10:e1004766.
- 355 22. San Millan A, Heilbron K, MacLean RC. 2014. Positive epistasis between co-infecting  
356 plasmids promotes plasmid survival in bacterial populations. *The ISME journal* 8:601-  
357 12.
- 358 23. Loftie-Eaton W, Bashford K, Quinn H, Dong K, Millstein J, Hunter S, Thomason MK,  
359 Merrih H, Ponciano JM, Top EM. 2017. Compensatory mutations improve general  
360 permissiveness to antibiotic resistance plasmids. *Nature Ecology & Evolution*  
361 doi:10.1038/s41559-017-0243-2.
- 362 24. CLSI. 2007. CLSI. Clinical and Laboratory Standards Institute. Performance Standards for  
363 Antimicrobial Susceptibility Testing-Seventeenth edition: Approved Standar M100-S17.  
364 CLSI, Wayne, PA, USA.
- 365 25. San Millan A, Santos-Lopez A, Ortega-Huedo R, Bernabe-Balas C, Kennedy SP,  
366 Gonzalez-Zorn B. 2015. Small-Plasmid-Mediated Antibiotic Resistance Is Enhanced by  
367 Increases in Plasmid Copy Number and Bacterial Fitness. *Antimicrobial Agents and*  
368 *Chemotherapy* 59:AAC.00235-15.
- 369 26. Providenti MA, O'Brien JM, Ewing RJ, Paterson ES, Smith ML. 2006. The copy-number  
370 of plasmids and other genetic elements can be determined by SYBR-Green-based  
371 quantitative real-time PCR. *J Microbiol Methods* 65:476-87.
- 372 27. Hall AR, MacLean RC. 2011. Epistasis buffers the fitness effects of rifampicin-  
373 resistance mutations in *Pseudomonas aeruginosa*. *Evolution* 65:2370-9.
- 374 28. Dixon LG, Albritton WL, Willson PJ. 1994. An analysis of the complete nucleotide  
375 sequence of the *Haemophilus ducreyi* broad-host-range plasmid pLS88. *Plasmid*  
376 32:228-32.
- 377 29. Ibanez M, Alvarez I, Rodriguez-Pena JM, Rotger R. 1997. A ColE1-type plasmid from  
378 *Salmonella enteritidis* encodes a DNA cytosine methyltransferase. *Gene* 196:145-58.
- 379 30. Pan L. 2010. A New ColE1-like Plasmid Group Revealed by Comparative Analysis of the  
380 Replication Proficient Fragments of Vibrionaceae Plasmids. *Journal of Microbiology*  
381 *and Biotechnology* 20:1163-1178.
- 382 31. San Millan A, Giufré M, Escudero JA, Hidalgo L, Gutierrez B, Cerquetti M, Gonzalez-  
383 Zorn B. 2011. Contribution of ROB-1 and PBP3 mutations to the resistance phenotype  
384 of a  $\beta$ -lactamase-positive amoxicillin/clavulanic acid-resistant *Haemophilus influenzae*  
385 carrying plasmid pB1000 in Italy. *The Journal of antimicrobial chemotherapy* 66:96-9.

- 386 32. San Millan A, Escudero JA, Catalan A, Nieto S, Farelo F, Gibert M, Moreno MA,  
387 Dominguez L, Gonzalez-Zorn B. 2007. Beta-lactam resistance in *Haemophilus parasuis*  
388 Is mediated by plasmid pB1000 bearing blaROB-1. *Antimicrobial agents and*  
389 *chemotherapy* 51:2260-4.
- 390 33. Wright CL, Strugnell RA, Hodgson AL. 1997. Characterization of a *Pasteurella multocida*  
391 plasmid and its use to express recombinant proteins in *P. multocida*. *Plasmid* 37:65-79.
- 392 34. Silva RF, Mendonça SCM, Carvalho LM, Reis AM, Gordo I, Trindade S, Dionisio F. 2011.  
393 Pervasive Sign Epistasis between Conjugative Plasmids and Drug-Resistance  
394 Chromosomal Mutations. *PLoS Genetics* 7:e1002181.
- 395 35. San Millan A, Escudero JA, Gifford DR, Mazel D, MacLean RC. 2016. Multicopy plasmids  
396 potentiate the evolution of antibiotic resistance in bacteria. *Nature Ecology and*  
397 *Evolution*.
- 398 36. Martinez JL, Cercenado E, Rodriguez-Creixems M, Vicente-Perez MF, Delgado-  
399 Iribarren A, Baquero F. 1987. Resistance to beta-lactam/clavulanate. *Lancet* 2:1473.
- 400 37. San Millan A, Toll-Riera M, Qi Q, MacLean RC. 2015. Interactions between horizontally  
401 acquired genes create a fitness cost in *Pseudomonas aeruginosa*. *Nat Commun* 6:6845.
- 402 38. Pena-Miller R, Rodriguez-Gonzalez R, MacLean RC, San Millan A. 2015. Evaluating the  
403 effect of horizontal transmission on the stability of plasmids under different selection  
404 regimes. *Mob Genet Elements* 5:1-5.
- 405 39. Harrison E, Brockhurst MA. 2012. Plasmid-mediated horizontal gene transfer is a  
406 coevolutionary process. *Trends in Microbiology* 20:262-267.
- 407 40. Harrison E, Guymer D, Spiers AJ, Paterson S, Brockhurst MA. 2015. Parallel  
408 compensatory evolution stabilizes plasmids across the parasitism-mutualism  
409 continuum. *Curr Biol* 25:2034-9.
- 410 41. Hall JP, Wood AJ, Harrison E, Brockhurst MA. 2016. Source-sink plasmid transfer  
411 dynamics maintain gene mobility in soil bacterial communities. *Proc Natl Acad Sci U S*  
412 *A* 113:8260-5.
- 413 42. Loftie-Eaton W, Yano H, Burleigh S, Simmons RS, Hughes JM, Rogers LM, Hunter SS,  
414 Settles ML, Forney LJ, Ponciano JM, Top EM. 2016. Evolutionary Paths That Expand  
415 Plasmid Host-Range: Implications for Spread of Antibiotic Resistance. *Mol Biol Evol*  
416 33:885-97.
- 417 43. Yano H, Wegrzyn K, Loftie-Eaton W, Johnson J, Deckert GE, Rogers LM, Konieczny I,  
418 Top EM. 2016. Evolved plasmid-host interactions reduce plasmid interference cost.  
419 *Mol Microbiol* doi:10.1111/mmi.13407.
- 420 44. Porse A, Schonning K, Munck C, Sommer MO. 2016. Survival and evolution of a large  
421 multidrug resistance plasmid in new clinical bacterial hosts. *Mol Biol Evol*  
422 doi:10.1093/molbev/msw163.
- 423 45. Stalder T, Rogers LM, Renfrow C, Yano H, Smith Z, Top EM. 2017. Emerging patterns of  
424 plasmid-host coevolution that stabilize antibiotic resistance. *Scientific Reports* 7:4853.
- 425 46. Medaney F, Ellis RJ, Raymond B. 2016. Ecological and genetic determinants of plasmid  
426 distribution in *Escherichia coli*. *Environ Microbiol* 18:4230-4239.

427

428

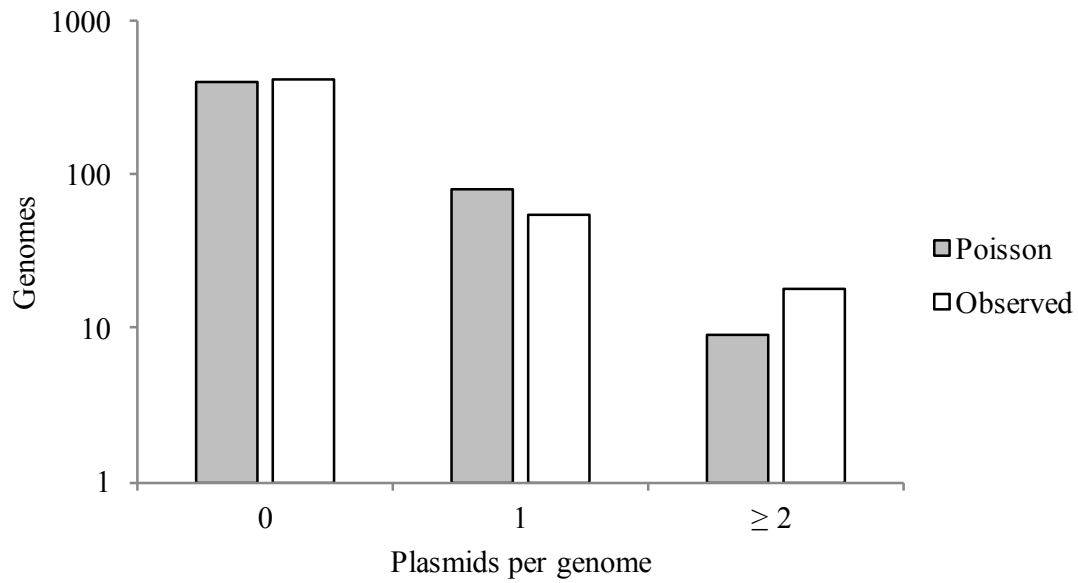

429

430 Figure 1. Distribution of ColE1 plasmids in bacterial genomes.

431 Number of plasmids per bacterial genome. The grey bars represent the expected number  
432 of genomes carrying from zero to  $\geq 2$  plasmids following a Poisson distribution (using  
433 the average plasmid/strain observed in the 490 bacterial genomes analyzed from  
434 GenBank). The white bars represent the observed frequency of strains carrying zero to  
435  $\geq 2$  plasmids in the bacterial genomes analyzed.

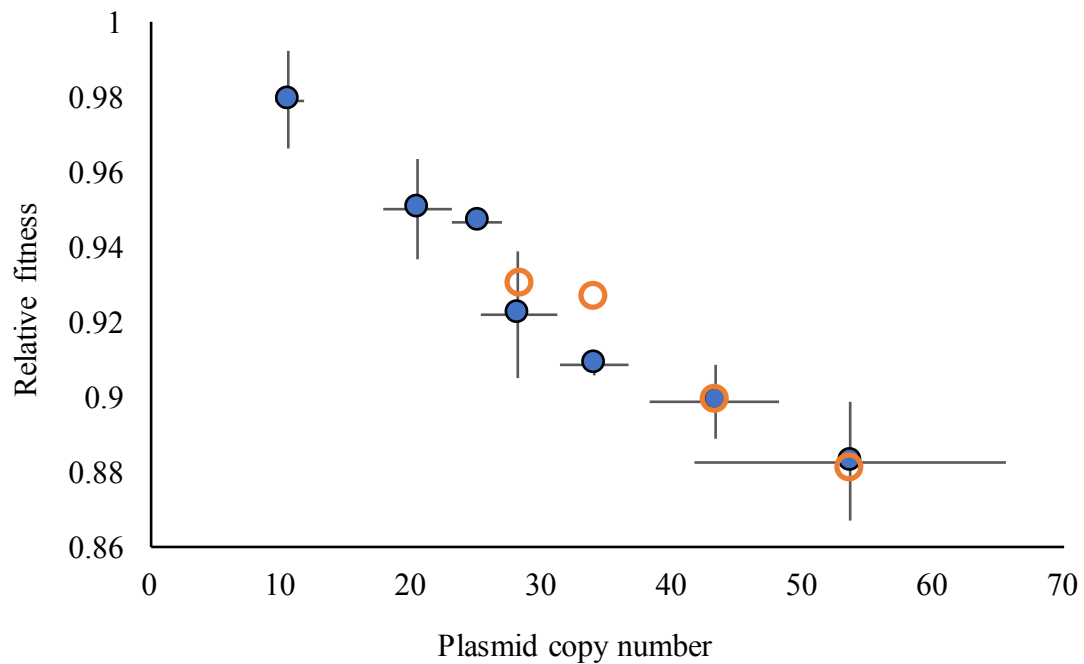

436

437 Figure 2. Plasmid copy number and fitness.

438 Correlation between relative fitness of the Rd strain transformed with the different  
439 plasmids (Y axis), calculated as  $1+s$ , and total plasmid copy number per chromosome  
440 (X axis). From left to right the blue circles represent the empirical fitness of:  
441 Rd/pB1006, Rd/pB1005, Rd/pB1000, Rd/pB1005/pB1006, Rd/pB1006/pB1000,  
442 RdpB1005/pB1000 and Rd/pB1005/pB1006/pB1005. SEM are also indicated. Orange  
443 circumferences denote the expected fitness calculated as the multiplication of the  
444 fitnesses of the strains bearing plasmids independently. From left to right is represented  
445 the theoretical fitness of Rd/pB1005/pB1006, Rd/pB1006/pB1000, RdpB1005/pB1000  
446 and Rd/pB1005/pB1006/pB1005.

447

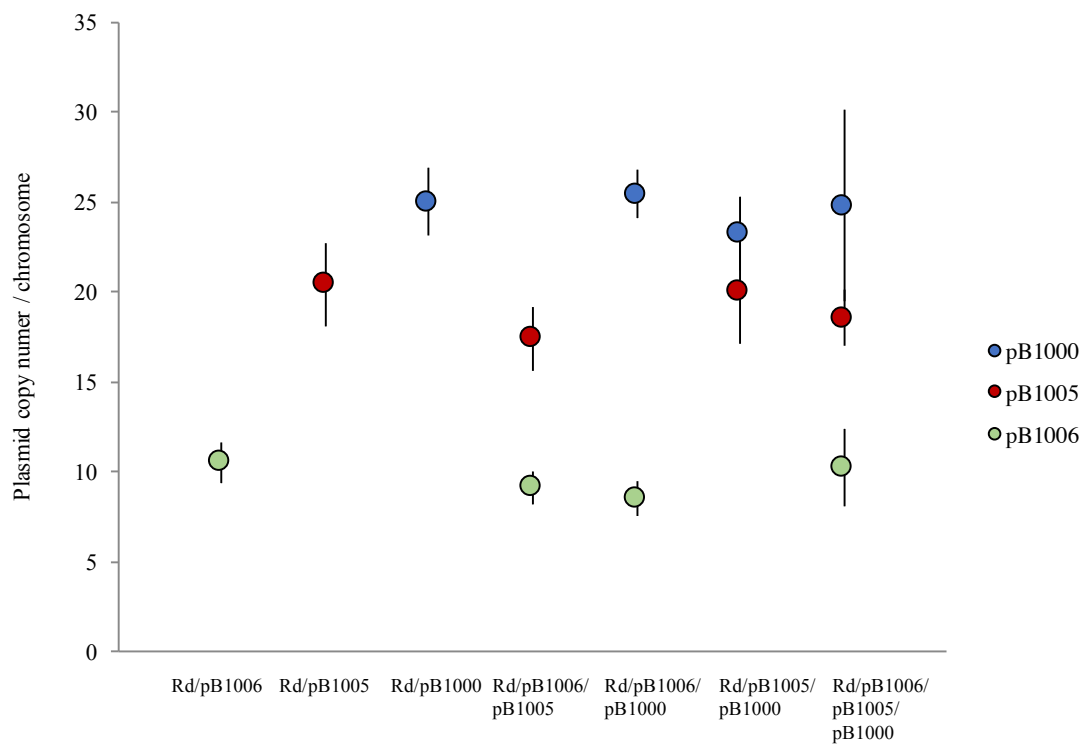

448

449 Figure 3. Plasmid copy number in Rd transformed strain.

450 Plasmid copy number per chromosome (Y axis) measured from the seven different  
451 combinations (X axis). Green, blue and red dots denote pB1006, pB1005 and pB1000  
452 respectively. SEM are also indicated.

453

454

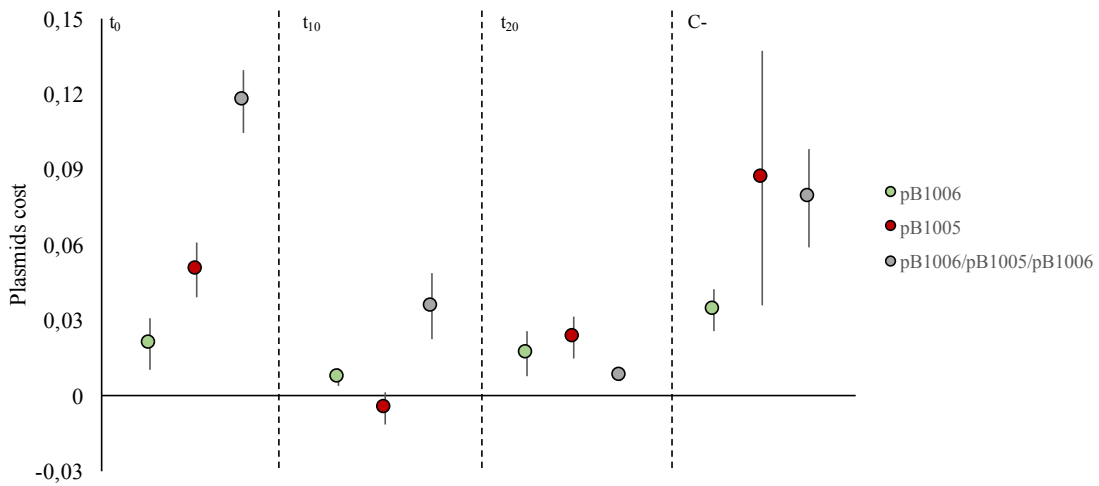

455

456 Figure 4 Plasmids cost across the experiment Rd/pB1000

457 Fitness cost ( $\pm$ SEM) of pB1006 (green), pB1005 (red) and pB1000/pB1005/pB1000  
458 (grey) calculated as the selection coefficient (see methods) at different time-points of  
459 the experiment. In  $t_0$ , the dots represent the fitness cost of the plasmids when newly  
460 acquired by Rd strain. In  $t_{100}$  and  $t_{200}$  is represented the biological cost of the plasmids  
461 when transformed in the Rd/pB1000 evolved during 100 and 200 generations. In C- is  
462 represented the biological cost of the plasmids transformed in the Rd evolved without  
463 pB1000 during 100 generations.



| Acquisition of new plasmids                                                         | Fitness variation |
|-------------------------------------------------------------------------------------|-------------------|
| <b>Non-evolved bacteria</b>                                                         |                   |
| 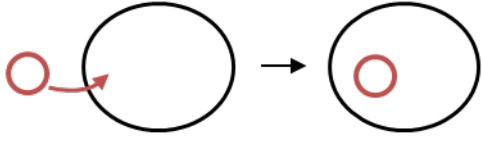   | ↓                 |
|    | ↓                 |
| <b>Environmentally adapted bacteria</b>                                             |                   |
|    | ↓                 |
|   | ↓                 |
| <b>Compensated plasmid by adaptation</b>                                            |                   |
|  | =                 |

465

466 Figure 5. Compensatory evolution facilitates plasmid cohabitation.

467 Acquisition of new plasmid(s) and the effect on the bacterial relative fitness. Red circle  
468 denote the acquired plasmid. Non-evolved bacteria or non-evolved plasmid are shown  
469 in black; laboratory adapted bacteria are shown in blue and compensated bacteria-  
470 plasmid are shown in green. The acquisition of a new ColE1 plasmid in the naïve host  
471 (bearing or lacking a plasmid), entails a decrease in the bacterial relative fitness, as well  
472 as the acquisition of the plasmid in an environmental-adapted bacterium lacking a  
473 plasmid. The acquisition of a new plasmid in the compensated plasmid-carrying  
474 bacteria does not result in any fitness cost.

| Strain                  | Plasmid Copy Number | Relative Fitness <sup>a</sup> | MIC(mg/l) <sup>b</sup> |      |      |
|-------------------------|---------------------|-------------------------------|------------------------|------|------|
|                         |                     |                               | Tet                    | Str  | Amp  |
| Rd                      | 0                   | 1                             | 2                      | 8    | 0,25 |
| Rd/pB1006               | 10,53 ± 1,112       | 0,979 ± 0,012                 | 16                     | 8    | 0,25 |
| Rd/pB1005               | 20,45 ± 2,59        | 0,950 ± 0,013                 | 2                      | 1024 | 0,25 |
| Rd/pB1000               | 25,02 ± 1,92        | 0,946 ± 0,002                 | 2                      | 8    | 512  |
| Rd/pB1005/pB1006        | 28,17 ± 2,37        | 0,921 ± 0,017                 | 16                     | 1024 | 0,25 |
| Rd/pB1006/pB1000        | 33,96 ± 3,01        | 0,909 ± 0,003                 | 16                     | 8    | 512  |
| Rd/pB1005/pB1000        | 43,22 ± 4,43        | 0,899 ± 0,009                 | 2                      | 512  | 512  |
| Rd/pB1006/pB1005/pB1006 | 53,58 ± 12,48       | 0,883 ± 0,016                 | 32                     | 512  | 512  |

475

476 Table 1. Plasmid copy number, relative fitness and MIC of the transformed plasmids in  
477 Rd.

478 Plasmid copy number, fitness and antimicrobial susceptibility of the seven strains  
479 generated eletroporing the plasmids in the Rd strain. <sup>a</sup> The relative fitness is expressed  
480 compared to the Rd strain. <sup>b</sup> Tet, tetracycline; Str, streptomycin and Amp, ampicillin.

481

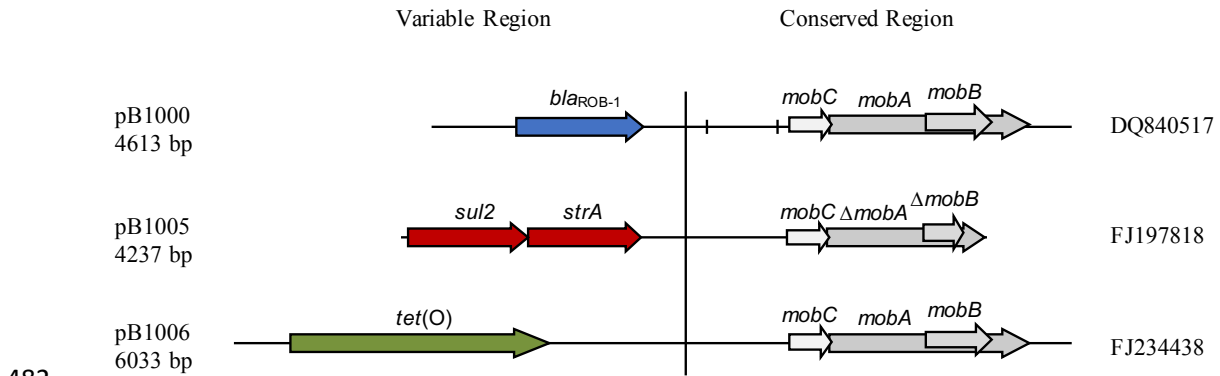

482

483

484 Figure S1. Genetic structure of ColE1 plasmids utilized in this study.

485 Schematic diagram of the 3 ColE1 plasmids used in this study. The reading frames for  
486 genes are shown as arrows, with the direction of transcription indicated by the  
487 arrowhead. The names of the genes are indicated. Genes encoding plasmid relaxases are  
488 shown in gray and the *rom* gene implicated in the regulation of plasmid replication is  
489 shown in yellow. In pB1000, two vertical bars bracket the region containing the origin  
490 of replication (*oriV*). The large vertical bar separates the conserved region of the  
491 plasmids, to the right, from the variable region of the plasmids, to the left. The  
492 accession numbers of plasmids are also indicated. The origins of replication (*oriV*s) of  
493 these three plasmids are highly similar compared to the unique *oriV* described in a  
494 ColE1 from Pasteurellaceae family (28): 89.43%, 99.93% and 91.01% conservation in  
495 pB1000, pB1005 and pB1006 respectively.

496

| Strain or plasmid       | Description and characteristics <sup>a</sup>                                                          | Reference |
|-------------------------|-------------------------------------------------------------------------------------------------------|-----------|
| <b>Strain</b>           |                                                                                                       |           |
| <i>H. influenzae</i>    |                                                                                                       |           |
| Rd                      | Tet <sup>S</sup> , Str <sup>S</sup> , Amp <sup>S</sup> recipient strain in electroporation            | NC_000907 |
| Rd/pB1006               | Rd electroporated with pB1006, Tet <sup>R</sup> ,                                                     | This work |
| Rd/pB1005               | Rd electroporated with pB1005, Str <sup>R</sup> ,                                                     | This work |
| Rd/pB1000               | Rd electroporated with pB1000, Amp <sup>R</sup> ,                                                     | This work |
| Rd/pB1006/pB1005        | Rd electroporated with pB1006 and pB1005, Tet <sup>R</sup> , Str <sup>R</sup>                         | This work |
| Rd/pB1006/pB1000        | Rd electroporated with pB1006 and pB1000, Tet <sup>R</sup> , Amp <sup>R</sup> ,                       | This work |
| Rd/pB1005/pB1000        | Rd electroporated with pB1006 and pB1000, Str <sup>R</sup> , Amp <sup>R</sup> ,                       | This work |
| Rd/pB1006/pB1005/pB1000 | Rd electroporated with pB1006 and pB1000, Tet <sup>R</sup> , Str <sup>R</sup> ,<br>Amp <sup>R</sup> , | This work |
| <b>Plasmids</b>         |                                                                                                       |           |
| pB1000                  | <i>mobA mobB mobC bla<sub>ROB-1</sub></i> ; ColE1 superfamily                                         | (9)       |
| pB1005                  | <i>mobA mobB mobC strA</i> ; ColE1 superfamily                                                        | (9)       |
| pB1006                  | <i>mobA mobB mobC tet(O)</i> ; ColE1 superfamily                                                      | (9)       |

498

499 Table S1. Strains and plasmids used in this study.

500 Strains and plasmids used in the compensation-acquisition hypothesis. <sup>a</sup> Tet,  
501 tetracycline; Str, streptomycin and Amp, ampicillin; “R” and “S” means resistant and  
502 susceptible respectively.

503

| Primers  | Sequence (5' → 3')      | Fragment amplified   | Efficiency | Annealing T° |
|----------|-------------------------|----------------------|------------|--------------|
| TET(O) F | CCAGACAGCAGTGACATC      | pB1006 (200 bp)      | 95,7-99,1% | 54,6°C       |
| TET(O) R | TCGGAATCTTCATTATCTGTAGT |                      |            |              |
| STRA F   | TTGGTTTGTCATAGATATTC    | pB1005 (199 bp)      | 98,8%      | 55,1°C       |
| STRA R   | AATGATGAGCGATTTATTC     |                      |            |              |
| ROB-1 F  | CCAATTCTGTTTCATTCGGTAAC | pB1000 (195 bp)      | 95,8%      | 58,5°C       |
| ROB-1 R  | CATAAGCAAAGCGTTCATCTG   |                      |            |              |
| RPOB F   | GCAGACGAAGCGGAAATC      | <i>rpoB</i> (192 bp) | 95,7-99,8% | 51,7°C       |
| RPOB R   | AAGGCTATAAGAACCTGTTGAAC |                      |            |              |

504

505 Table S2. Primers used in this study.

506 Primers used in the qPCRs. The sequence, fragment amplified, efficiency of the qPCR

507 and Annealing T° of the primers are indicated.

| Specie                      | Strain      | ColE1-like plasmid                                                                    | Others <sup>a</sup> | Characteristics <sup>b</sup>                                               |
|-----------------------------|-------------|---------------------------------------------------------------------------------------|---------------------|----------------------------------------------------------------------------|
| <b>Enterobacteriaceae</b>   |             |                                                                                       |                     |                                                                            |
| <i>Citrobacter freundii</i> | CAV1741     | pCAV1741-1960,<br>pCAV1741-3233                                                       | 4                   | HP <sup>1</sup> , HP                                                       |
| <i>C. freundii</i>          | CAV1321     | pCAV1321-1916,<br>pCAV1321-3233,<br>pCAV1321-3820,<br>pCAV1321-4310,<br>pCAV1321-4938 | 4                   | HP, HP, HP, HP,<br>HP                                                      |
| <i>Enterobacter cloacae</i> | 34978       | P34978-4.398, p34978-<br>5.413, p34978-2.725                                          | 3                   | HP, HP, HP, HP                                                             |
| <i>Escherichia coli</i>     | O26:H11     | pO26_4, pO26_3                                                                        | 2                   | HP, R/M <sup>2</sup>                                                       |
| <i>E. coli</i>              | SMS-3-5     | pSMS35-8, pSMS35_3                                                                    | 2                   | Col-E10 <sup>3</sup> , IS1                                                 |
| <i>E. coli</i>              | O55:H7      | p12579_5, p12579_4,<br>p12579_3                                                       | 2                   | M/R; Aph(3'')-ib,<br>Aph(6)-Id; TEM-1                                      |
| <i>E. coli</i>              | E24377A     | pETEC_6, pETEC_5                                                                      | 4                   | Aph(6)-Id,<br>Aph(3'')-Ib, <i>sul2</i> ;<br><i>nga</i>                     |
| <i>E. coli</i>              | SE11        | pSE11-5, pSE11-4                                                                      | 4                   | HP, <i>nga</i>                                                             |
| <i>E. coli</i>              | PCN061      | PCN061p3, PCN061p2,<br>PCN061p1                                                       | 3                   | <i>sul2</i> , Aph(3'')-Ib,<br>Aph(6)-Id; HP; HP                            |
| <i>E. coli</i>              | ST648       | pEC648_7, pEC648_5                                                                    | 4                   | HP, HP.                                                                    |
| <i>Klebsiella oxytoca</i>   | CAV1374     | pCAV1374-6538,<br>pCAV1374-14                                                         | 9                   | Tn3, Tn3                                                                   |
| <i>K. pneumoniae</i>        | 234-12      | pKpn2312-5, pKpn23412-4                                                               | 0                   | HP, HP                                                                     |
| <i>K. pneumoniae</i>        | MGH 78578   | pKPN6, pKPN7                                                                          | 3                   | HP, HP                                                                     |
| <i>K. pneumoniae</i>        | Kp13        | pKP13b, pKP13c                                                                        | 4                   | SMR <sup>4</sup>                                                           |
| Salmonella<br>Typhimurium   | CFSAN001921 | unnamed 2 (NC_021843),<br>unnamed3 (NC_021816)                                        | 1                   | HP, HP                                                                     |
| <i>S. enterica</i>          | YU39        | pYU39_4.8, pYU39_4.2                                                                  | 4                   | HP, HP                                                                     |
| <i>Serratia marcescens</i>  | CAV1492     | pCAV1492-3223,<br>pCAV1492-6393                                                       | 4                   | ND                                                                         |
| <i>Shigella flexneri</i>    | 2002017     | pSFxv_3, pSFxv_4,<br>pSFxv_5                                                          | 2                   | <i>strA</i> , HP, Fe <sup>5</sup>                                          |
| <i>S. sonnei</i>            | Ss046       | pSS046_spA, pSS046_spB                                                                | 2                   | <i>tet(A)</i> , Col-E1 <sup>3</sup>                                        |
| <b>Pasteurellaceae</b>      |             |                                                                                       |                     |                                                                            |
| <i>A. pleuropneuminae</i>   | AP76        | pB1002, pB1003, APP7_C                                                                | ND                  | <i>bla</i> <sub>ROB-1</sub> ; <i>strA</i> , <i>sul2</i> ; *                |
| <i>H. parasuis</i>          | BB1020      | pB1000, pB1006                                                                        | ND                  | <i>bla</i> <sub>ROB-1</sub> , <i>tet(O)</i>                                |
| <i>P. aerogenes</i>         | BB1084      | pB1000, pIG1                                                                          | ND                  | <i>bla</i> <sub>ROB-1</sub> , <i>strA</i>                                  |
| <i>P. multocida</i>         | BB1038      | pB1000, pB1005                                                                        | ND                  | <i>bla</i> <sub>ROB-1</sub> ; <i>strA</i> , <i>sul2</i>                    |
| <i>P. multocida</i>         | BB1039      | pB1000, p9956                                                                         | ND                  | <i>bla</i> <sub>ROB-1</sub> , <i>tet(H)</i>                                |
| <i>P. multocida</i>         | BB1046      | pB1002, pB1003                                                                        | ND                  | <i>bla</i> <sub>ROB-1</sub> ; <i>strA</i> , <i>sul2</i>                    |
| <i>P. multocida</i>         | BB1044      | pB1000, pB1005, pB1006                                                                | ND                  | <i>bla</i> <sub>ROB-1</sub> ; <i>strA</i> , <i>sul2</i> ;<br><i>tet(O)</i> |

Table S3. ColE1 plasmids cohabiting in nature.

<sup>a</sup> Non ColE1 plasmids presented in the same cell<sup>b</sup> Genes founded in the variable region of ColE1 plasmids: <sup>1</sup> HP, Hypothetical Protein; <sup>2</sup> M/R, Restriction/Modification System; <sup>3</sup> Col-E1, Colicin E1; <sup>4</sup> SMR, *Small Multidrug Resistance proteins*; <sup>5</sup> Fe, involved in ferric resistance; \* Cryptic plasmid.
